# Supplementary material for: Can an app supporting psoriasis patients improve adherence to topical treatment? A single-blind randomized controlled trial
Source: Springer Nature journal article supplement (doi:10.1186/s12895-018-0071-3), 2018-02-07
Supplement: MOESM2 [file 15445922]

**Study protocol**

**Can an App Supporting Psoriasis Patients Improve Adherence to Topical Treatment? A single-blind randomized controlled trial**

**[Additional file 1: World Health Organization Trial Registration Data Set.](#)**

World Health Organization Trial Registration Data Set

| DATA CATEGORY                                 | INFORMATION                                                                                                                                                                                                                                                                                                                                                                                                |
|-----------------------------------------------|------------------------------------------------------------------------------------------------------------------------------------------------------------------------------------------------------------------------------------------------------------------------------------------------------------------------------------------------------------------------------------------------------------|
| Primary registry and trial identifying number | ClinicalTrials.gov, NCT 02858713                                                                                                                                                                                                                                                                                                                                                                           |
| Date of registration in primary registry      | August 3, 2016                                                                                                                                                                                                                                                                                                                                                                                             |
| Secondary identifying numbers                 | EudraCT number 2016-002143-42                                                                                                                                                                                                                                                                                                                                                                              |
| Sources of monetary and material support      | LEO® Pharma and anonymous fund                                                                                                                                                                                                                                                                                                                                                                             |
| Primary sponsor                               | Professor Klaus Ejner Andersen, Department of Dermatology and Allergy Centre, Odense University Hospital, Denmark, e-mail: KHAndersen@health.sdu.dk                                                                                                                                                                                                                                                        |
| Secondary sponsor                             | None                                                                                                                                                                                                                                                                                                                                                                                                       |
| Contact for public queries                    | Investigator, MD Mathias Tiedemann Svendsen, e-mail: mathias.tiedemann.svendsen@rsyd.dk                                                                                                                                                                                                                                                                                                                    |
| Contact for scientific queries                | Investigator, MD Mathias Tiedemann Svendsen, e-mail: mathias.tiedemann.svendsen@rsyd.dk                                                                                                                                                                                                                                                                                                                    |
| Public title                                  | Adherence in Topical Treatment of Psoriasis                                                                                                                                                                                                                                                                                                                                                                |
| Scientific title                              | A Designed Patient-Centered Intervention to Improve Medical Adherence in Topical Treatment of Psoriasis: A single-blind randomized controlled trial                                                                                                                                                                                                                                                        |
| Countries of recruitment                      | Denmark                                                                                                                                                                                                                                                                                                                                                                                                    |
| Health conditions and problems studied        | Medical adherence in topical treatment of psoriasis                                                                                                                                                                                                                                                                                                                                                        |
| Intervention                                  | Intervention: Calcipotriol/betamethasone dipropionate (Ca/BD) foam + electronic monitor (EM) +application for smartphones (app)<br><br>Non-intervention: Ca/BD foam + EM                                                                                                                                                                                                                                   |
| Key inclusion and exclusion criteria          | Inclusion: <ul style="list-style-type: none"> <li>- Legally competent patients of sound mind between 18-75 years of age</li> <li>- Mild-moderate plaque and guttate type psoriasis</li> <li>- The psoriasis must be visible to the investigator at the baseline visit)</li> <li>- Users of smartphones (the app can be used in most types of smartphone)</li> <li>- Access to a private e-mail.</li> </ul> |

|                          |                                                                                                                                                                                                                                                                                                                                                                                                                                                                                                                                                                                                                                                 |
|--------------------------|-------------------------------------------------------------------------------------------------------------------------------------------------------------------------------------------------------------------------------------------------------------------------------------------------------------------------------------------------------------------------------------------------------------------------------------------------------------------------------------------------------------------------------------------------------------------------------------------------------------------------------------------------|
|                          | <p>Exclusion:</p> <ul style="list-style-type: none"> <li>- Minors and patients over 75 years of age</li> <li>- Legally incompetent patients or patients not of sound mind</li> <li>- Patients for whom a psoriasis diagnosis cannot be objectified at the consultation</li> <li>- Patients with severe psoriasis, including erythrodermic and pustular psoriasis</li> <li>- Lack of possession of or ability to use a smartphone</li> <li>- Breastfeeding or pregnant patients or fertile women who do not use reliable contraception</li> <li>- Patients who are allergic to one of the ingredients in the Cal/BD foam preparation.</li> </ul> |
| Study type               | <p>Interventional<br/> Allocation: randomized<br/> Intervention model: parallel assignment<br/> Masking: Single blind (subject)<br/> Primary purpose: testing an adherence improving intervention<br/> Phase IV</p>                                                                                                                                                                                                                                                                                                                                                                                                                             |
| Date of first enrolment: | January 9, 2017                                                                                                                                                                                                                                                                                                                                                                                                                                                                                                                                                                                                                                 |
| Target sample size       | 134                                                                                                                                                                                                                                                                                                                                                                                                                                                                                                                                                                                                                                             |
| Recruitment status       | All participants recruited                                                                                                                                                                                                                                                                                                                                                                                                                                                                                                                                                                                                                      |
| Primary outcomes         | <p>Rates of adherence measured by:</p> <ul style="list-style-type: none"> <li>- No treatment sessions (chip)</li> <li>- Weight of used medication (electronic weight)</li> <li>- Patient reported on a 4-point ordinal scale</li> </ul>                                                                                                                                                                                                                                                                                                                                                                                                         |
| Key secondary outcomes   | <p>DLQI: Dermatology Quality of Life Index<br/> LS-PGA: Lattice System Physician's Global Assessment</p>                                                                                                                                                                                                                                                                                                                                                                                                                                                                                                                                        |
