# Supplementary material for: Can an app supporting psoriasis patients improve adherence to topical treatment? A single-blind randomized controlled trial
Source: Springer Nature journal article supplement (doi:10.1186/s12895-018-0071-3), 2018-02-07
Supplement: MOESM3 [file 15445922]

**Study protocol**

**Can an App Supporting Psoriasis Patients Improve Adherence to Topical Treatment? A single-blind randomized controlled trial**

**Additional file 2: General information. Name and addresses of study site, affiliated laboratory, business partners, and public authorities providing assistance for the study.**

**Study site**

Department of Dermatology and Allergy Centre, Odense University Hospital, Klørvænget 15, Entrance 142, DK-5000 Odense C

**Pharmaceutical company that has provided a grant to pay for the study and supplied the study medication, app, and electronic monitor (EM)**

LEO<sup>®</sup> Pharma, Industriparken 55, DK-2750 Ballerup

**Hospital pharmacy storing and printing labels for the study medication**

Hospital Pharmacy Funen, J.B. Winsløvs Vej 13, Entrance 208, DK-5000 Odense C

**Affiliated laboratory providing technical assistance to the study participants for the installation of the app and keeping records of electronic monitors and study medication**

Dermatological Investigations Scandinavia (DIS), University of Southern Denmark, J. B. Winsløvs Vej 9, DK-5000 Odense C

**Company extracting data from the EM and responsible for hosting the server for the app**

BridgelT, Tobaksvejen 25, DK-2860 Søborg

**Unit responsible for the randomization process and statistical analyses and providing assistance for storing data**

Odense Patient data Explorative Network (OPEN), Odense University Hospital, Odense, Denmark & Department of Clinical Research, University of Southern Denmark, Odense, Denmark, J.B. Winsløvs Vej 9 A, DK-5000 Odense c

**Unit responsible for legally-required monitoring and audits**

Good Clinical Practice (GCP) Unit, Department of Clinical Biochemistry and Pharmacology, Odense University Hospital, J. B. Winsløvs Vej 19, DK-5000 Odense C
